# Supplementary material for: Isolation and identification of endophytic fungi from Conyza blinii that exhibit antioxidant and antibacterial activities
Source: PeerJ. 2025 May 20;13:e19464. doi: 10.7717/peerj.19464 (PMC12101443; doi:10.7717/peerj.19464)
Supplement: Supplemental Information 1 [file peerj-13-19464-s001.xlsx]

## Sheet: Gallic acid standard curve
Gallic acid concentration（mg/L)	0	2	4	6	8	10
absorbance1	0.048	0.184	0.306	0.433	0.548	0.675
absorbance2	0.047	0.185	0.306	0.433	0.548	0.675
absorbance3	0.049	0.186	0.307	0.434	0.549	0.676
average	0.048	0.185	0.306333	0.433333	0.548333	0.675333

## Sheet: TPC
	absorbance of TPC(ethyl acetate)					absorbance of TPC(n-butanol)					absorbance of TPC(chloroform)					absorbance of TPC(Petroleum ether)
	F. pseudoanthophilum (CBF5)	F. foetens (CBF9)	F. circinatum (CBF10)	F. panlongense (CBF18)		F. pseudoanthophilum (CBF5)	F. foetens (CBF9)	F. circinatum (CBF10)	F. panlongense (CBF18)		F. pseudoanthophilum (CBF5)	F. foetens (CBF9)	F. circinatum (CBF10)	F. panlongense (CBF18)		F. pseudoanthophilum (CBF5)	F. foetens (CBF9)	F. circinatum (CBF10)	F. panlongense (CBF18)
absorbance1	0.244	0.279	0.301	0.244		0.189	0.243	0.26	0.152		0.131	0.147	0.154	0.112		0.066	0.094	0.103	0.086
absorbance2	0.243	0.274	0.289	0.245		0.189	0.244	0.266	0.152		0.135	0.151	0.16	0.118		0.067	0.098	0.101	0.082
absorbance3	0.243	0.276	0.295	0.24		0.185	0.25	0.258	0.149		0.131	0.15	0.159	0.114		0.067	0.101	0.095	0.081
concentration of TPC 1 （mg/L）	3.03859	3.60129	3.95498	3.03859		2.15434	3.02251	3.29582	1.55949		1.22186	1.4791	1.59164	0.916399		0.176849	0.62701	0.771704	0.498392
concentration of TPC 2（mg/L）	3.02251	3.5209	3.76206	3.05466		2.15434	3.03859	3.39228	1.55949		1.28617	1.54341	1.6881	1.01286		0.192926	0.691318	0.73955	0.434084
concentration of TPC 3（mg/L）	3.02251	3.55305	3.85852	2.97428		2.09003	3.13505	3.26367	1.51125		1.22186	1.52733	1.67203	0.948553		0.192926	0.73955	0.643087	0.418006
concentration of TPC 1（mg GAE/g）	60.7717	72.0257	79.0997	60.7717		43.0868	60.4502	65.9164	31.1897		24.4373	29.582	31.8328	18.328		3.53698	12.5402	15.4341	9.96785
concentration of TPC 2（mg GAE/g）	60.4502	70.418	75.2412	61.0932		43.0868	60.7717	67.8457	31.1897		25.7235	30.8682	33.7621	20.2572		3.85852	13.8264	14.791	8.68167
concentration of TPC 3（mg GAE/g）	60.4502	71.0611	77.1704	59.4855		41.8006	62.701	65.2733	30.2251		24.4373	30.5466	33.4405	18.9711		3.85852	14.791	12.8617	8.36013
Mean value	60.557	71.168	77.17	60.45		42.658	61.308	66.345	30.868		24.865	30.332	33.012	19.185		3.7516	13.719	14.362	9.003
Standard deviation	0.185	0.809	1.93	0.85		0.742	1.217	1.339	0.557		0.7424	0.669	0.1034	0.982		0.1859	1.129	1.338	0.851

## Sheet: Clearance rate
F. pseudoanthophilum-DPPH								F. pseudoanthophilum-Hydroxyl radical								F. pseudoanthophilum-Superoxide anion radical								F. pseudoanthophilum-ABTS
	Clearance rate								Clearance rate								Clearance rate								Clearance rate
Concentration（mg/mL）	0.2	0.4	0.6	0.8	1	3		Concentration（mg/mL）	0.2	0.4	0.6	0.8	1	3		Concentration（mg/mL）	0.2	0.4	0.6	0.8	1	3		Concentration（mg/mL）	0.2	0.4	0.6	0.8	1	3
Vc	97.42	97.42	97.44	97.45	97.46	97.5		Vc	42.36	50.95	62.14	71.69	82.14	91.36		Vc	59.45	81.06	87.64	87.15	86.25	85.14		Vc	96.36	96.48	97.63	97.63	97.15	98.41
	97.15	97.24	97.36	97.4	97.43	97.45			41.96	51.36	61.37	72.46	83.74	92.48			57.36	79.63	86.48	88.95	86.74	84.15			96.36	97.86	97.58	96.58	97.58	98.63
	97.68	97.66	97.59	97.62	97.63	97.64			44.68	53.14	64.35	70.98	80.68	95.14			60.48	83.45	88.21	86.21	87.45	86.67			97.58	97.62	97.85	97.48	97.65	97.45
Ethyl acetate	19.05	33.33	47.76	62.95	79.51	83.94		Ethyl acetate	40.65	42.68	45.95	49.65	52.48	56.92		Ethyl acetate	44.63	45.85	46.34	47.36	49.19	51.62		Ethyl acetate	82.64	85.14	88.71	91.69	93.45	93.17
	20.79	34.18	48.31	61.1	76.2	82.36			42.15	43.85	43.36	50.14	55.25	57.19			44.21	45.21	47.23	47.85	49.31	52.84			80.08	86.47	87.03	90.41	92.85	93.66
	18.39	35.81	47.36	60.64	77.16	84.06			40.31	42.53	46.33	52.24	54.92	59.36			43.84	45.05	46.96	48.63	48.25	51.6			83.48	85.25	89.64	90.47	92.85	94.52
n-butanol	14.28	24.16	30.84	41.83	50.78	55.91		n-butanol	38.14	40.36	42.39	45.64	48.4	50.41		n-butanol	21.52	22.63	23.54	24.85	25.69	27.68		n-butanol	84.74	86.39	88.69	91.52	92.69	93.48
	15.92	24.92	33.91	43.84	51.74	56.94			37.56	41.94	43.1	45.55	49.3	51.73			20.55	22.69	23.47	24.12	25.96	27.85			81.36	84.77	87.39	91.85	92.33	93.58
	13.41	23.71	34.15	45.19	52.81	54.92			37.85	40.32	42.8	44.39	48.39	51.38			21.52	23.52	24.65	25.05	25.85	28.4			82.36	85.69	88.35	90.48	92.58	93.47
chloroform	10.64	15.92	26.87	30.84	39.54	45.86		chloroform	16.54	18.39	21.45	22.58	24.3	26.85		chloroform	11.36	12.58	13.14	14.85	15.63	17.36		chloroform	52.34	57.64	63.45	68.15	74.85	81.69
	11.48	18.74	28.16	32.91	40.63	45.52			17.37	18.84	19.59	21.83	24.36	25.53			11.5	11.52	13.85	14.6	15.85	18.42			50.24	55.47	60.25	65.84	72.14	80.36
	12.92	20.71	29.86	35.18	41.28	46.94			16.29	17.96	19.5	21.99	25.15	27.74			10.85	12.52	13.63	14.4	15.2	18.63			52.36	58.45	63.48	68.25	74.9	81.85
Petroleum ether	4.35	12.54	16.54	18.27	22.48	27.84		Petroleum ether	41.34	48.69	55.6	62.7	70.69	76.34		Petroleum ether	26.96	28.42	28.45	30.85	32.58	34.62		Petroleum ether	32.85	35.69	36.4	38.25	41.36	43.69
	4.69	12.14	15.39	18.67	22.17	28.46			40.93	48.23	53.16	63.25	73.48	77.66			25.41	28.69	29.63	30.86	32.69	35.64			32.85	35.21	36.94	38.25	42.58	44.57
	4.85	11.84	16.59	19.48	22.86	29.2			40.25	48.86	53.24	59.48	72.95	75.14			26.85	27.36	29.51	31.25	33.14	35.75			31.52	34.85	35.47	39.21	41.3	46.28
F. foetens-DPPH								F. foetens-Hydroxyl radical								F. foetens-Superoxide anion radical								F. foetens-ABTS
	Clearance rate								Clearance rate								Clearance rate								Clearance rate
Concentration（mg/mL）	0.2	0.4	0.6	0.8	1	3		Concentration（mg/mL）	0.2	0.4	0.6	0.8	1	3		Concentration（mg/mL）	0.2	0.4	0.6	0.8	1	3		Concentration（mg/mL）	0.2	0.4	0.6	0.8	1	3
Vc	97.42	97.42	97.44	97.45	97.46	97.5		Vc	42.36	50.95	62.14	71.69	82.14	91.36		Vc	59.45	81.06	87.64	87.15	86.25	85.14		Vc	96.36	96.48	97.63	97.63	97.15	98.41
	97.15	97.24	97.36	97.4	97.43	97.45			41.96	51.36	61.37	72.46	83.74	92.48			57.36	79.63	86.48	88.95	86.74	84.15			96.36	97.86	97.58	96.58	97.58	98.63
	97.68	97.66	97.59	97.62	97.63	97.64			44.68	53.14	64.35	70.98	80.68	95.14			60.48	83.45	88.21	86.21	87.45	86.67			97.58	97.62	97.85	97.48	97.65	97.45
Ethyl acetate	22.85	36.99	51.32	66.87	84.34	89.96		Ethyl acetate	40.69	44.69	49.25	53.48	57.62	60.33		Ethyl acetate	49.06	50.64	51.84	52.64	52.84	54.17		Ethyl acetate	68.25	73.51	78.14	82.58	86.21	94.52
	23.69	37.41	52.74	65.73	83.47	89.43			41.36	43.87	51.17	52.3	56.48	62.8			48.51	51.46	51.96	52.75	53.47	55.47			67.12	72.89	77.64	81.52	86.47	93.65
	25.47	38.95	54.17	65.94	83.3	90.93			42.14	44.25	50.69	54.69	56.5	60.48			49.64	50.25	52.2	52.88	53.66	55.48			66.54	73.82	77.14	82.31	87.41	94.52
n-butanol	20.39	34.58	46.28	62.87	80.64	84.69		n-butanol	35.8	38.96	40.36	43.58	47.69	52.17		n-butanol	36.45	38.69	39.84	42.58	44.85	46.85		n-butanol	64.25	70.55	75.48	80.52	84.12	91.36
	21.78	35.17	47.39	62.31	76.34	83.71			34.22	35.15	38.45	44.16	45.85	54.39			36.58	39.46	40.58	41.39	42.85	47.36			64.25	70.45	74.94	80.96	83.47	91.52
	19.68	36.96	47.31	61.57	77.93	84.39			36.25	38.45	38.21	43.26	46.15	52.89			35.84	38.47	39.14	41.95	42.82	47.95			63.25	69.48	76.31	79.58	83.04	90.41
chloroform	13.94	22.69	30.54	37.94	46.39	52.48		chloroform	22.54	24.36	27.79	28.36	29.99	31.35		chloroform	8.69	9.48	10.74	11.36	12.85	13.58		chloroform	44.85	46.39	47.95	49.25	50.14	53.69
	13.08	21.61	30.89	39.48	46.02	53.61			21.54	23.39	26.48	28.47	28.47	33.45			8.64	9.48	9.98	10.98	12.58	13.85			43.18	45.14	47.25	48.69	51.85	54.32
	13.69	22.14	31.87	37.58	47.99	52.24			23.58	22.48	28.69	26.14	30.41	31.85			8.93	9.58	10.05	11.47	13.54	15.42			44.71	45.28	48.69	50.41	50.36	55.39
Petroleum ether	8.41	13.68	22.94	27.46	33.95	37.41		Petroleum ether	36.58	39.58	43.17	45.59	48.84	53.41		Petroleum ether	18.65	19.58	20.47	21.58	23.47	25.84		Petroleum ether	42.53	45.82	48.36	50.48	51.51	54.21
	8.01	13.27	22.47	27.03	33.28	37.76			36.21	38.47	44.39	44.15	49.33	52.48			18.15	19.68	20.14	22.63	23.69	26.48			40.39	42.58	45.69	48.64	49.17	55.96
	8.34	13.81	23.04	27.69	33.99	34.84			34.72	36.88	42.47	43.84	50.48	55.18			18.45	19.58	19.69	21.85	24.85	26.65			43.97	48.58	46.14	51.39	53.14	55.34
F. circinatum-DPPH								F. circinatum-Hydroxyl radical								F. circinatum-Superoxide anion radical								F. circinatum-ABTS
	Clearance rate								Clearance rate								Clearance rate								Clearance rate
Concentration（mg/mL）	0.2	0.4	0.6	0.8	1	3		Concentration（mg/mL）	0.2	0.4	0.6	0.8	1	3		Concentration（mg/mL）	0.2	0.4	0.6	0.8	1	3		Concentration（mg/mL）	0.2	0.4	0.6	0.8	1	3
Vc	97.42	97.42	97.44	97.45	97.46	97.5		Vc	42.36	50.95	62.14	71.69	82.14	91.36		Vc	59.45	81.06	87.64	87.15	86.25	85.14		Vc	96.36	96.48	97.63	97.63	97.15	98.41
	97.15	97.24	97.36	97.4	97.43	97.45			41.96	51.36	61.37	72.46	83.74	92.48			57.36	79.63	86.48	88.95	86.74	84.15			96.36	97.86	97.58	96.58	97.58	98.63
	97.68	97.66	97.59	97.62	97.63	97.64			44.68	53.14	64.35	70.98	80.68	95.14			60.48	83.45	88.21	86.21	87.45	86.67			97.58	97.62	97.85	97.48	97.65	97.45
Ethyl acetate	24.82	37.64	53.94	67.93	85.69	92.36		Ethyl acetate	40.49	42.25	44.98	47.74	50.65	54.66		Ethyl acetate	42.59	44.36	47.52	49.58	53.47	58.36		Ethyl acetate	75.16	79.35	85.45	87.64	91.36	97.14
	23.99	38.92	54.71	66.87	86.74	94.85			39.35	41.87	42.95	49.62	50.69	55.36			40.63	44.86	48.21	50.85	53.81	58.21			74.14	78.6	84.71	87.15	90.69	96.47
	26.19	38.78	55.49	67.48	86.84	95.64			39.21	40.39	44.25	47.78	52.16	56.27			41.54	45.04	47.99	50.47	54.39	59.84			74.36	79.48	84.36	86.96	91.48	96.18
n-butanol	21.62	35.95	47.69	64.85	82.74	87.64		n-butanol	21.56	25.36	29.79	33.15	36.14	41.28		n-butanol	26.58	28.14	30.25	31.58	33.96	36.45		n-butanol	74.36	78.36	82.69	85.47	88.39	90.14
	22.94	36.18	48.25	64.28	79.56	86.15			20.86	23.52	27.46	31.85	35.21	43.39			25.87	27.78	31.52	31.7	33.87	36.54			72.94	77.45	83.47	84.75	87.26	89.47
	20.48	37.58	48.74	63.17	79.68	87.34			23.95	25.48	27.69	32.28	36.85	42.35			26.25	28.45	30.52	32.52	34.58	36.39			75.14	80.54	84.14	86.91	89.64	91.54
chloroform	14.93	23.64	31.52	38.64	47.14	53.74		chloroform	11.52	13.21	14.66	16.34	18.36	21.17		chloroform	15.69	16.54	17.96	19.35	20.47	22.48		chloroform	42.36	44.85	48.74	52.69	56.84	63.95
	13.82	22.84	31.95	39.48	48.63	54.63			10.94	11.39	16.38	17.48	15.48	22.84			15.36	16.88	17.54	19.85	20.49	22.85			41.63	43.96	47.61	51.31	55.84	64.22
	14.65	23.72	32.48	37.69	48.95	52.47			10.14	12.39	14.96	16.24	16.58	22.85			15.47	16.98	18.12	19.86	21.85	23.69			40.85	44.28	46.82	52.97	55.47	62.99
Petroleum ether	8.68	14.03	22.64	26.95	34.91	38.96		Petroleum ether	20.36	24.31	28.14	32.69	36.47	39.84		Petroleum ether	25.48	28.63	30.85	32.5	34.14	37.85		Petroleum ether	31.28	36.47	40.14	43.96	47.69	49.55
	8.26	13.95	23.14	27.03	34.82	38.48			18.47	22.17	26.48	33.59	35.04	40.39			25.63	27.63	31.25	33.25	34.85	38.46			30.58	36.59	42.14	42.17	45.96	50.8
	8.59	13.54	22.06	26.41	33.47	37.64			18.63	22.87	27.69	32.48	35.94	41.08			24.38	28.69	30.47	32.69	33.69	38.54			29.28	34.28	38.24	40.85	44.28	48.24
F. panlongense-DPPH								F. panlongense-Hydroxyl radical								F. panlongense-Superoxide anion radical								F. panlongense-ABTS
	Clearance rate								Clearance rate								Clearance rate								Clearance rate
Concentration（mg/mL）	0.2	0.4	0.6	0.8	1	3		Concentration（mg/mL）	0.2	0.4	0.6	0.8	1	3		Concentration（mg/mL）	0.2	0.4	0.6	0.8	1	3		Concentration（mg/mL）	0.2	0.4	0.6	0.8	1	3
Vc	97.42	97.42	97.44	97.45	97.46	97.5		Vc	42.36	50.95	62.14	71.69	82.14	91.36		Vc	59.45	81.06	87.64	87.15	86.25	85.14		Vc	96.36	96.48	97.63	97.63	97.15	98.41
	97.15	97.24	97.36	97.4	97.43	97.45			41.96	51.36	61.37	72.46	83.74	92.48			57.36	79.63	86.48	88.95	86.74	84.15			96.36	97.86	97.58	96.58	97.58	98.63
	97.68	97.66	97.59	97.62	97.63	97.64			44.68	53.14	64.35	70.98	80.68	95.14			60.48	83.45	88.21	86.21	87.45	86.67			97.58	97.62	97.85	97.48	97.65	97.45
Ethyl acetate	25.99	42.26	59.52	63.49	72.62	80.56		Ethyl acetate	40.84	43.84	46.58	50.84	52.36	55.48		Ethyl acetate	39.18	43.44	45.83	46.51	48.55	53.83		Ethyl acetate	72.36	77.15	83.45	88.74	92.15	97.15
	26.31	43.78	60.37	65.02	73.42	81.17			40.95	44.85	46.36	51.84	54.21	56.84			38.54	42.69	45.96	47.36	48.51	52.48			71.13	76.45	82.45	88.05	91.45	96.65
	25.16	42.34	58.42	63.85	72.42	80.41			37.46	42.39	49.35	52.36	53.31	58.31			38.9	43.24	46.25	48.59	50.69	54.39			71.45	75.6	83.69	87.14	92.87	97.36
n-butanol	13.74	22.58	30.74	37.49	46.39	52.18		n-butanol	20.16	22.36	25.48	28.83	31.14	34.96		n-butanol	26.39	27.45	29.86	32.65	34.58	37.58		n-butanol	67.85	70.04	72.96	75.85	80.63	85.74
	12.85	21.39	30.18	38.92	47.53	52.96			21.39	23.69	23.69	29.87	32.54	35.94			26.14	28.69	29.54	31.58	35.47	36.94			65.28	70.53	73.54	75.48	79.25	82.47
	13.63	22.17	31.94	36.99	47.18	51.84			21.41	21.47	24.51	28.05	30.84	37.25			25.85	27.45	30.54	32.25	33.69	37.48			64.28	69.25	70.15	73.69	75.14	82.36
chloroform	9.28	14.86	23.48	26.74	35.97	40.85		chloroform	18.43	19.63	21.25	22.65	24.57	26.21		chloroform	11.36	11.85	12.69	13.58	14.28	16.96		chloroform	64.58	67.69	70.69	72.69	76.95	82.36
	9.77	15.32	24.06	28.17	35.54	40.63			18.32	20.05	21.39	22.36	25.95	26.14			11.04	11.96	12.74	14.36	14.85	16.65			67.25	69.48	72.47	74.14	79.84	83.54
	10.59	14.69	22.47	27.21	36.82	39.24			16.39	20.95	22.39	23.07	24.95	26.09			11.68	12.06	12.99	13.88	14.94	17.2			64.25	66.85	70.26	72.49	76.21	84.6
Petroleum ether	5.84	13.85	18.94	21.7	25.3	29.36		Petroleum ether	25.36	28.36	30.28	32.54	34.13	38.17		Petroleum ether	15.36	16.85	17.45	18.69	19.25	21.36		Petroleum ether	27.48	29.51	32.58	34.57	36.95	38.25
	5.78	12.43	18.5	21.81	24.94	28.84			24.49	27.64	31.95	32.45	35.15	39.94			15.2	16.54	17.58	18.69	19.85	20.69			25.58	30.14	30.85	32.58	34.8	39.1
	5.92	12.27	17.28	22.17	24.04	30.77			22.64	30.25	32.51	34.85	36.54	38.12			14.69	15.36	16.39	17.58	19.13	21.54			25.9	27.58	31.5	34.84	36.25	38.35

## Sheet: IC50
The IC50 values were calculated using Graphpad; this table is for summarization purposes only.
F. pseudoanthophilum
	DPPH-IC50	mean	SD		Hydroxyl radical-IC50				Superoxide anion radical-IC50				ABTS-IC50
Vc1	2.59352e+150				0.31882	0.312102	0.0134636	c	0.105819	0.111515	0.0122762	b	2.97329e-06
Vc2	1.58545e-34				0.320884				0.125605				5.71987e-07
Vc3	6.67698e+149				0.296601				0.103122				1.93085e+63
ethyl acetate1	0.572104	0.577601	0.00478349	c	0.93776	0.853596	0.0876174	b	1.75684	1.59649	0.210518	a	0.010117	0.0118342	0.00432778	b
ethyl acetate2	0.579887				0.860136				1.3581				0.0167571
ethyl acetate3	0.580813				0.762892				1.67454				0.00862859
n-butanol1	1.5587	1.48154	0.0678829	b	2.21423	2.01787	0.216835	a	4568.75				0.00357217	0.00868074	0.00507838	b
n-butanol2	1.43101				1.78515				1644.15				0.0137284
n-butanol3	1.4549				2.05423				2877.84				0.00874167
chloroform1	3.00502	2.91488	0.14944	a	188.325				10100.5				0.191651	0.202785	0.0224477	a
chloroform2	2.99725				602.268				2035.49				0.228624
chloroform3	2.74238				92.2998				1641.78				0.188081
petroleum ether1	14.358				0.368204	0.379672	0.0116859	c	233.569				11.0275
petroleum ether2	13.0461				0.379248				74.8168				7.85142
petroleum ether3	12.0015				0.391564				85.7943				5.31959
F. foetens
	DPPH-IC50				Hydroxyl radical-IC50				Superoxide anion radical-IC50				ABTS-IC50
Vc1	2.59352e+150				0.31882	0.312102	0.0134636	d	0.105819	0.111515	0.0122762	b	2.97329e-06
Vc2	1.58545e-34				0.320884				0.125605				5.71987e-07
Vc3	6.67698e+149				0.296601				0.103122				1.93085e+63
ethyl acetate1	0.509476	0.499978	0.0121956	c	0.611548	0.592962	0.019652	c	0.264596	0.266301	0.0132267	a	0.0720126	0.0776437	0.00599266	b
ethyl acetate2	0.504233				0.594943				0.280297				0.0769764
ethyl acetate3	0.486225				0.572394				0.254009				0.083942
n-butanol1	0.565688	0.567396	0.00229024	b	2.02512	2.00347	0.157282	a	5.22105				0.0888023	0.0899696	0.00182047	b
n-butanol2	0.569998				1.83649				6.00128				0.0890393
n-butanol3	0.566501				2.14881				4.78931				0.0920672
chloroform1	1.94678	1.89583	0.0546501	a	215.248				36663.1				1.02149	0.959347	0.0898199	a
chloroform2	1.83811				55.9611				17059.2				1.00019
chloroform3	1.90258				190.392				2276.88				0.856363
petroleum ether1	5.38104				1.59141	1.5819	0.128444	b	1624.37				0.907271	0.926872	0.200637	a
petroleum ether2	5.2369				1.70532				611.555				1.13659
petroleum ether3	6.63291				1.44896				509.611				0.736754
F. circinatum
	DPPH-IC50				Hydroxyl radical-IC50				Superoxide anion radical-IC50				ABTS-IC50
Vc1	2.59352e+150				0.31882	0.312102	0.0134636	b	0.105819	0.111515	0.0122762	b	2.97329e-06
Vc2	1.58545e-34				0.320884				0.125605				5.71987e-07
Vc3	6.67698e+149				0.296601				0.103122				1.93085e+63
ethyl acetate1	0.487017	0.480961	0.00770531	b	1.22537	1.1717	0.0540153	a	0.778016	0.747967	0.0355176	a	0.048957	0.0498389	0.00123743	c
ethyl acetate2	0.483578				1.17238				0.757114				0.0512535
ethyl acetate3	0.472288				1.11734				0.708771				0.0493062
n-butanol1	0.538889	0.541306	0.00261408	b	6.76399				56.8192				0.0240041	0.0259385	0.00173806	c
n-butanol2	0.540947				5.27309				44.7726				0.0273689
n-butanol3	0.54408				6.79713				49.169				0.0264423
chloroform1	1.82578	1.79573	0.0815661	a	319.53				3119.98				0.580505	0.62481	0.0388757	b
chloroform2	1.7034				115.529				1719.38				0.640708
chloroform3	1.85801				93.4407				766.976				0.653218
petroleum ether1	4.80036				7.34856				26.316				2.24669	2.46806	0.453673	a
petroleum ether2	4.91942				6.13315				19.4372				2.16757
petroleum ether3	5.38381				5.77528				18.6525				2.98992
F. panlongense
	DPPH-IC50				Hydroxyl radical-IC50				Superoxide anion radical-IC50				ABTS-IC50
Vc1	2.59352e+150				0.31882	0.312102	0.0134636	b	0.105819	0.111515	0.0122762	b	2.97329e-06
Vc2	1.58545e-34				0.320884				0.125605				5.71987e-07
Vc3	6.67698e+149				0.296601				0.103122				1.93085e+63
ethyl acetate1	0.482266	0.4785	0.0133134	b	0.927888	0.839715	0.0764287	a	1.40864	1.36282	0.188978	a	0.0693028	0.0729249	0.00343991	a
ethyl acetate2	0.46371				0.792387				1.52468				0.0733242
ethyl acetate3	0.489526				0.79887				1.15515				0.0761477
n-butanol1	1.97275	1.93087	0.0674196	a	20.9772				29.3118				0.0368256	0.0367746	0.00217092	b
n-butanol2	1.8531				18.7798				37.3345				0.0345787
n-butanol3	1.96676				14.6033				30.186				0.0389197
chloroform1	4.26273				838.193				15686				0.0427281	0.0435435	0.0131042	b
chloroform2	4.36439				760.229				16620.2				0.0308661
chloroform3	4.7843				452.123				15919				0.0570364
petroleum ether1	13.1445				22.8327				15950.5				26.2017
petroleum ether2	13.3562				12.0993				28495.8				19.6882
petroleum ether3	10.5156				13.7249				2831.12				17.6432

## Sheet: MIC
		S. aureus
		Extracts‘ concentration（mg/mL）	4	2	1	0.5	0.25	0(Negative control)
Absorbance	F. pseudoanthophilum	Ethyl acetate	0.004	0.003	0.004	0.004	0.548	1.92
		n-Butanol	0.002	0.002	0.02	0.342	0.884	1.926
		Chloroform	0.005	0.005	0.374	0.839	1.42	1.983
		Petroleum ether	0.002	0.002	0.352	0.713	0.136	1.967
	F. foetens	Ethyl acetate	0.003	0.003	0.006	0.003	0.304	1.929
		n-Butanol	0.002	0.002	0.002	0.241	0.498	1.931
		Chloroform	0.003	0.005	0.211	0.73	1.588	1.89
		Petroleum ether	0.258	0.422	0.873	1.648	1.834	1.925
	F. circinatum	Ethyl acetate	0.002	0.003	0.002	0.223	0.603	1.916
		n-Butanol	0.005	0.005	0.254	0.657	1.468	1.908
		Chloroform	0.264	0.573	1.188	1.453	1.603	1.977
		Petroleum ether	0.253	0.582	1.004	1.399	1.541	1.919
	F. panlongense	Ethyl acetate	0.003	0.003	0.003	0.262	0.442	1.914
		n-Butanol	0.002	0.002	0.003	0.252	0.525	1.996
		Chloroform	0.417	0.832	1.366	1.53	1.797	1.882
		Petroleum ether	0.48	0.999	1.164	1.325	1.609	1.904
		B. subtilis
		Extracts‘ concentration（mg/mL）	4	2	1	0.5	0.25	0(Negative control)
Absorbance	F. pseudoanthophilum	Ethyl acetate	0.005	0.005	0.278	0.596	1.177	1.87
		n-Butanol	0.402	0.621	1.058	1.502	1.644	1.964
		Chloroform	0.976	1.097	1.391	1.622	1.803	1.889
		Petroleum ether	0.541	0.923	1.219	1.566	1.732	1.964
	F. foetens	Ethyl acetate	0.003	0.002	0.162	0.406	0.88	1.914
		n-Butanol	0.003	0.004	0.241	0.427	0.829	1.885
		Chloroform	0.003	0.004	0.137	0.395	0.83	1.932
		Petroleum ether	0.215	0.498	0.942	1.308	1.633	1.853
	F. circinatum	Ethyl acetate	0.003	0.002	0.003	0.126	0.316	1.86
		n-Butanol	0.004	0.005	0.212	0.494	0.994	1.872
		Chloroform	0.598	1.039	1.375	1.65	1.847	1.909
		Petroleum ether	0.002	0.002	0.097	0.243	0.441	1.942
	F. panlongense	Ethyl acetate	0.002	0.002	0.273	0.477	0.976	1.981
		n-Butanol	0.004	0.004	0.005	0.258	0.644	1.981
		Chloroform	0.004	0.004	0.199	0.452	0.794	1.943
		Petroleum ether	0.384	0.688	1.029	1.432	1.877	1.986
		E. coli
		Extracts‘ concentration（mg/mL）	4	2	1	0.5	0.25	0(Negative control)
Absorbance	F. pseudoanthophilum	Ethyl acetate	0.001	0.001	0.001	0.001	0.145	1.96
		n-Butanol	0.001	0.001	0.001	0.002	0.202	1.933
		Chloroform	0.002	0.002	0.154	0.368	0.772	1.855
		Petroleum ether	0.573	0.938	1.28	1.583	1.738	1.878
	F. foetens	Ethyl acetate	0.003	0.003	0.003	0.004	0.126	1.896
		n-Butanol	0.001	0.002	0.002	0.003	0.21	1.997
		Chloroform	0.002	0.005	0.188	0.316	0.818	1.926
		Petroleum ether	0.004	0.004	0.237	0.524	1.096	1.865
	F. circinatum	Ethyl acetate	0.002	0.005	0.153	0.317	0.667	1.918
		n-Butanol	0.002	0.002	0.003	0.087	0.159	1.961
		Chloroform	0.003	0.003	0.004	0.166	0.3	1.991
		Petroleum ether	0.004	0.004	0.243	0.488	0.934	1.937
	F. panlongense	Ethyl acetate	0.001	0.002	0.002	0.004	0.107	1.905
		n-Butanol	0.001	0.002	0.003	0.168	0.351	1.854
		Chloroform	0.002	0.004	0.289	0.526	1.088	1.891
		Petroleum ether	0.732	1.003	1.203	1.538	1.793	1.977
		P. aeruginosa
		Extracts‘ concentration（mg/mL）	4	2	1	0.5	0.25	0(Negative control)
Absorbance	F. pseudoanthophilum	Ethyl acetate	0.005	0.005	0.281	0.582	1.098	1.856
		n-Butanol	0.376	0.734	1.946	1.377	1.743	1.904
		Chloroform	0.35	0.714	1.075	1.36	1.676	1.923
		Petroleum ether	0.499	0.996	1.263	1.503	1.839	1.895
	F. foetens	Ethyl acetate	0.005	0.005	0.005	0.124	0.245	1.998
		n-Butanol	0.003	0.004	0.225	0.471	0.977	1.88
		Chloroform	1.378	1.495	1.629	1.738	1.839	1.901
		Petroleum ether	0.666	1.194	1.385	1.599	1.693	1.973
	F. circinatum	Ethyl acetate	0.001	0.002	0.002	0.093	0.225	1.921
		n-Butanol	0.003	0.003	0.155	0.329	0.65	1.893
		Chloroform	1.088	1.209	1.482	1.733	1.903	1.932
		Petroleum ether	1.593	1.689	1.756	1.837	1.923	1.953
	F. panlongense	Ethyl acetate	0.002	0.002	0.002	0.172	0.357	1.98
		n-Butanol	0.004	0.004	0.004	0.005	0.082	1.884
		Chloroform	0.003	0.003	0.139	0.283	0.539	1.904
		Petroleum ether	0.407	0.83	1.174	1.473	1.609	1.942

## Sheet: MBC
		S. aureus
		Extracts‘ concentration（mg/mL）	4	2	1	0.5	0.25
Single colony count	F. pseudoanthophilum	Ethyl acetate	0	1	7	>>5	>>5
		n-Butanol	9	>>5	>>5	>>5	>>5
		Chloroform	12	>>5	>>5	>>5	>>5
		Petroleum ether	>>5	>>5	>>5	>>5	>>5
	F. foetens	Ethyl acetate	0	0	13	>>5	>>5
		n-Butanol	0	0	10	>>5	>>5
		Chloroform	>>5	>>5	>>5	>>5	>>5
		Petroleum ether	8	>>5	>>5	>>5	>>5
	F. circinatum	Ethyl acetate	1	2	>>5	>>5	>>5
		n-Butanol	8	>>5	>>5	>>5	>>5
		Chloroform	>>5	>>5	>>5	>>5	>>5
		Petroleum ether	>>5	>>5	>>5	>>5	>>5
	F. panlongense	Ethyl acetate	0	1	16	>>5	>>5
		n-Butanol	13	>>5	>>5	>>5	>>5
		Chloroform	>>5	>>5	>>5	>>5	>>5
		Petroleum ether	>>5	>>5	>>5	>>5	>>5
		B. subtilis
		Extracts‘ concentration（mg/mL）	4	2	1	0.5	0.25
Single colony count	F. pseudoanthophilum	Ethyl acetate	17	>>5	>>5	>>5	>>5
		n-Butanol	>>5	>>5	>>5	>>5	>>5
		Chloroform	>>5	>>5	>>5	>>5	>>5
		Petroleum ether	>>5	>>5	>>5	>>5	>>5
	F. foetens	Ethyl acetate	7	>>5	>>5	>>5	>>5
		n-Butanol	21	>>5	>>5	>>5	>>5
		Chloroform	12	>>5	>>5	>>5	>>5
		Petroleum ether	>>5	>>5	>>5	>>5	>>5
	F. circinatum	Ethyl acetate	10	18	>>5	>>5	>>5
		n-Butanol	8	>>5	>>5	>>5	>>5
		Chloroform	>>5	>>5	>>5	>>5	>>5
		Petroleum ether	7	12	>>5	>>5	>>5
	F. panlongense	Ethyl acetate	16	>>5	>>5	>>5	>>5
		n-Butanol	8	11	>>5	>>5	>>5
		Chloroform	10	16	>>5	>>5	>>5
		Petroleum ether	>>5	>>5	>>5	>>5	>>5
		E. coli
		Extracts‘ concentration（mg/mL）	4	2	1	0.5	0.25
Single colony count	F. pseudoanthophilum	Ethyl acetate	0	0	12	>>5	>>5
		n-Butanol	0	0	8	>>5	>>5
		Chloroform	20	>>5	>>5	>>5	>>5
		Petroleum ether	>>5	>>5	>>5	>>5	>>5
	F. foetens	Ethyl acetate	0	0	10	>>5	>>5
		n-Butanol	0	0	3	>>5	>>5
		Chloroform	15	>>5	>>5	>>5	>>5
		Petroleum ether	>>5	>>5	>>5	>>5	>>5
	F. circinatum	Ethyl acetate	0	2	>>5	>>5	>>5
		n-Butanol	0	1	1	>>5	>>5
		Chloroform	6	>>5	>>5	>>5	>>5
		Petroleum ether	8	>>5	>>5	>>5	>>5
	F. panlongense	Ethyl acetate	1	1	>>5	>>5	>>5
		n-Butanol	11	>>5	>>5	>>5	>>5
		Chloroform	>>5	>>5	>>5	>>5	>>5
		Petroleum ether	>>5	>>5	>>5	>>5	>>5
		P. aeruginosa
		Extracts‘ concentration（mg/mL）	4	2	1	0.5	0.25
Single colony count	F. pseudoanthophilum	Ethyl acetate	1	4	>>5	>>5	>>5
		n-Butanol	>>5	>>5	>>5	>>5	>>5
		Chloroform	>>5	>>5	>>5	>>5	>>5
		Petroleum ether	>>5	>>5	>>5	>>5	>>5
	F. foetens	Ethyl acetate	0	0	3	>>5	>>5
		n-Butanol	0	0	>>5	>>5	>>5
		Chloroform	>>5	>>5	>>5	>>5	>>5
		Petroleum ether	>>5	>>5	>>5	>>5	>>5
	F. circinatum	Ethyl acetate	0	0	0	>>5	>>5
		n-Butanol		>>5	>>5	>>5	>>5
		Chloroform	>>5	>>5	>>5	>>5	>>5
		Petroleum ether	>>5	>>5	>>5	>>5	>>5
	F. panlongense	Ethyl acetate	0	0	0	>>5	>>5
		n-Butanol	6	>>5	>>5	>>5	>>5
		Chloroform	17	>>5	>>5	>>5	>>5
		Petroleum ether	>>5	>>5	>>5	>>5	>>5
